# Supplementary material for: Improving Agrobacterium tumefaciens−Mediated Genetic Transformation for Gene Function Studies and Mutagenesis in Cucumber (Cucumis sativus L.)
Source: MDPI journal article supplement (doi:10.3390/genes14030601), 2023-02-27
Supplement: s1 [file s1]

**Table S1.** Transformation efficiency (TE) of different genotypes from various experiments.

| <b>Genotype</b> | <b>Gene</b>  | <b><i>Agrobacterium</i> strain</b> | <b>Transgene approach</b> | <b># Seeds tested</b> | <b># Explants used</b> | <b># transformant*</b> | <b>TE (%) by seeds</b> | <b>TE (%) by Explants</b> |
|-----------------|--------------|------------------------------------|---------------------------|-----------------------|------------------------|------------------------|------------------------|---------------------------|
| <b>PS76</b>     | <i>LL</i>    | AGL1                               | Overexpressing            | 2103                  | 4925                   | 24                     | 1.14                   | 0.49                      |
|                 | <i>APRR2</i> | AGL1                               | RNAi                      | 500                   | 1000                   | 3                      | 0.60                   | 0.30                      |
|                 | <i>APRR2</i> | GV3101                             | RNAi                      | 500                   | 1000                   | 1                      | 0.20                   | 0.10                      |
|                 | Mean         |                                    |                           |                       |                        |                        | 0.90                   | 0.40                      |
| <b>H19</b>      | <i>LL</i>    | AGL1                               | Overexpressing            | 200                   | 400                    | 1                      | 0.50                   | 0.25                      |
| <b>9930</b>     | <i>FS1.1</i> | AGL1                               | Overexpressing            | 600                   | 1200                   | 3                      | 0.50                   | 0.25                      |
| <b>9930</b>     | <i>Cca4</i>  | AGL1                               | Overexpressing            | 300                   | 1200                   | 5                      | 1.67                   | 0.42                      |
| <b>9930</b>     | <i>SGR</i>   | EHA105                             | CRISPR-Cas9               | 2050                  | 4100                   | 23                     | 1.12                   | 0.56                      |
|                 | Mean         |                                    |                           |                       |                        |                        | 1.05                   | 0.48                      |

\* Validated with various methods

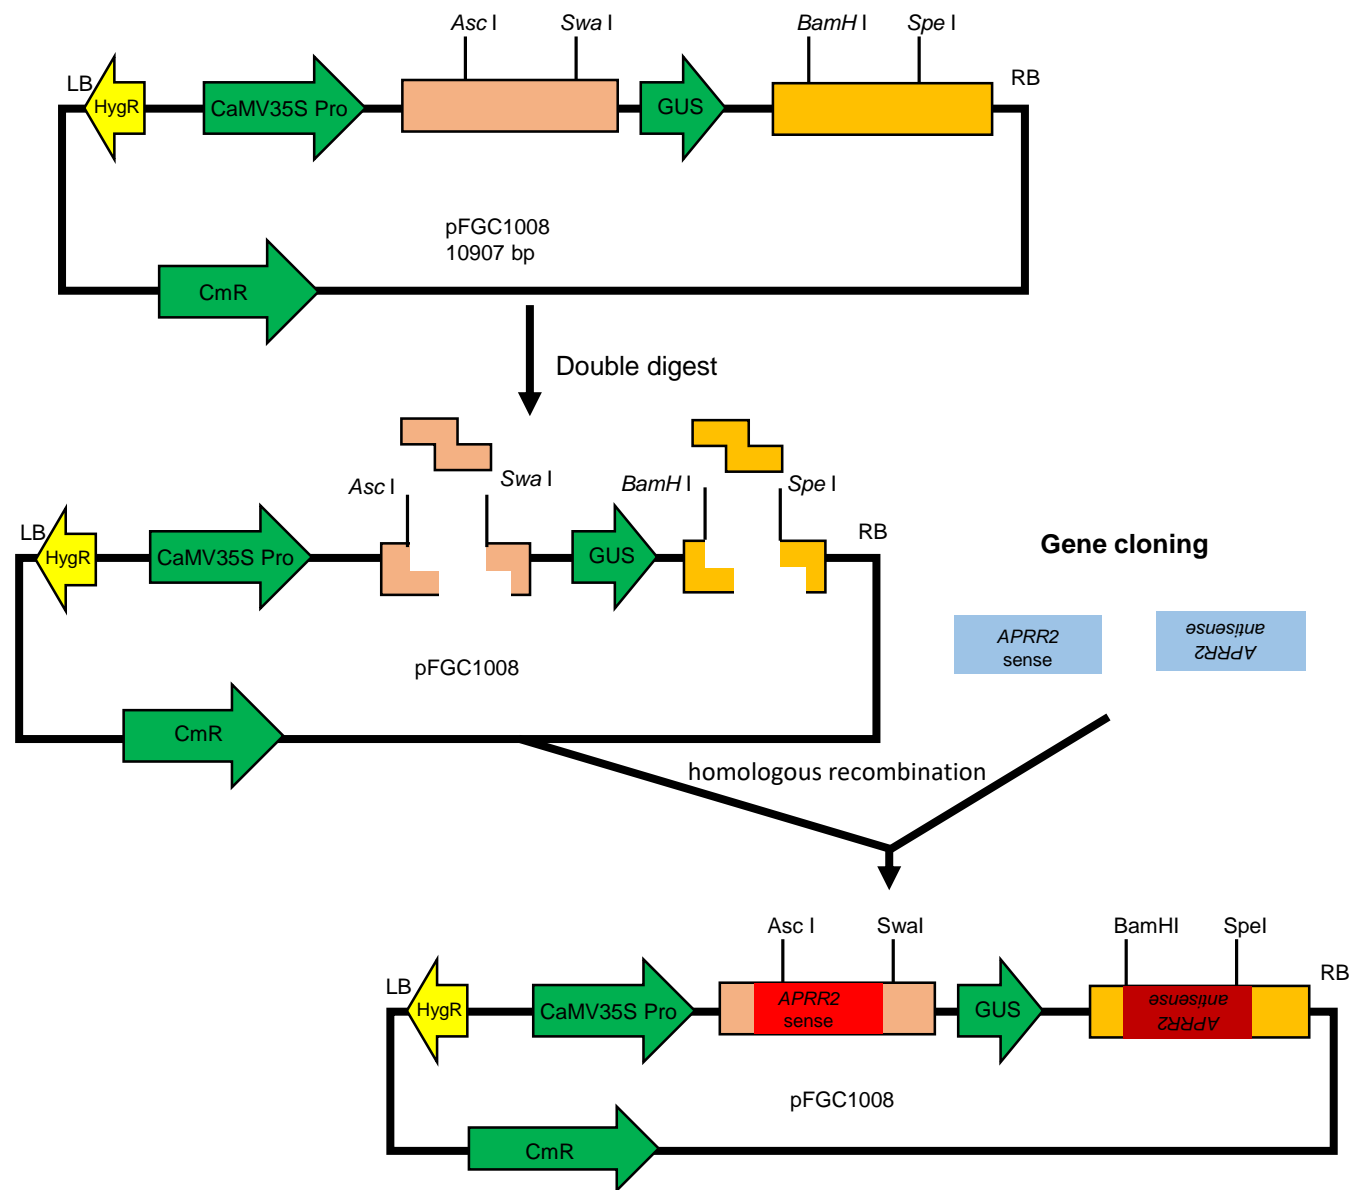

**Figure S1 RNAi construction of *APRR2* in pFGC1008.** Two *APRR2*-specific fragments were cloned and inversely inserted into the pFGC1008 plasmid double digested with *Asc*I/*Swa*I and *Bam*HI/*Spe*I. *HygR* is selective marker gene for hygromycin. *CmR* is selective marker gene for chloramphenicol. Pro indicates promoter. *GUS* is reporter gene for  $\beta$ -glucuronidase. *LB* and *RB* represent left and right borders of the T-DNA. **Primer sequences for *APRR2*-sense** are Forward (5'→3'): ACAATTACCATGGGGCGCGCCTGGCTTACCCTTCTTATCAT; Reverse (5'→3'): TTCATCTGGGGATTAAATGGACGGTGGAGATTCCCTTT; for *APRR2*-antisense Forward (5'→3'): GATCTCTTTGATGGGGATCCGGACGGTGGAGATTCCCTTT, Reverse (5'→3'): GCAGGACTCTAGGGACTAGTTGGCTTACCCTTCTTATCAT.

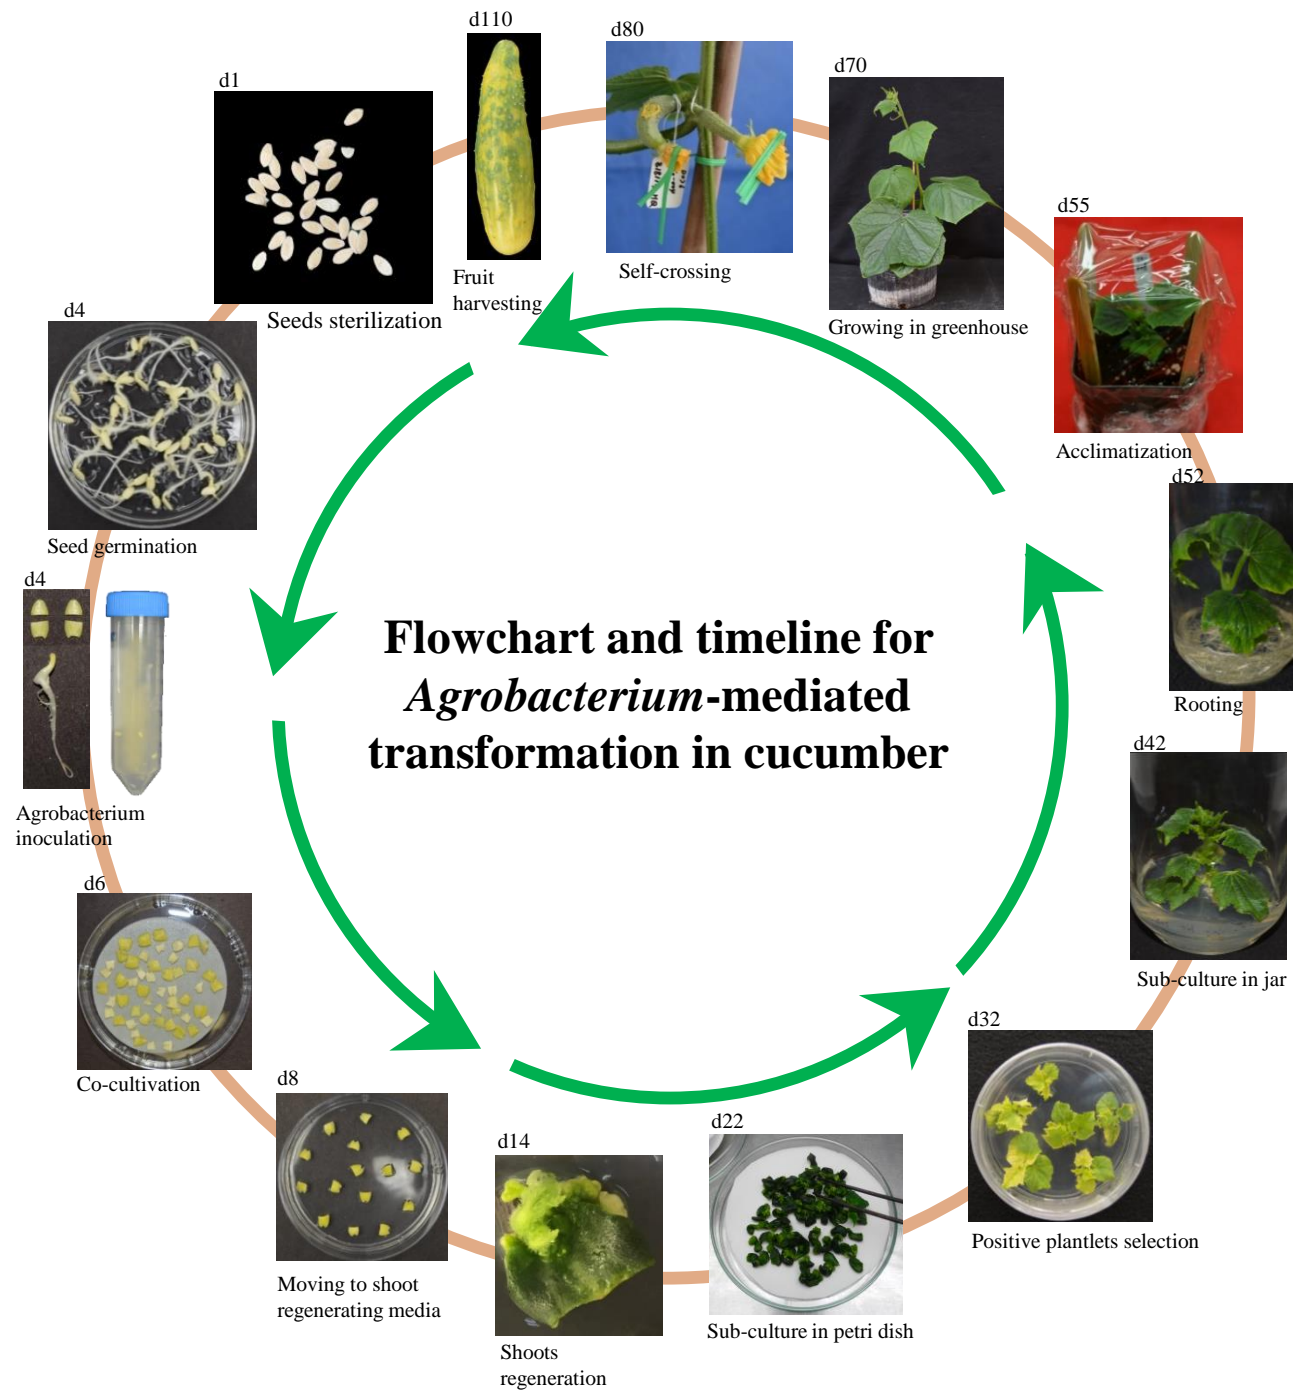

**Figure S2. Life cycle of *Agrobacterium*-mediated transformation in 110 days in cucumber.** Fourteen main steps were included in this 110-day of transformation protocol, which started from sterilizing seeds, and ended at extracting  $T_1$  seeds from  $T_0$  fruit.

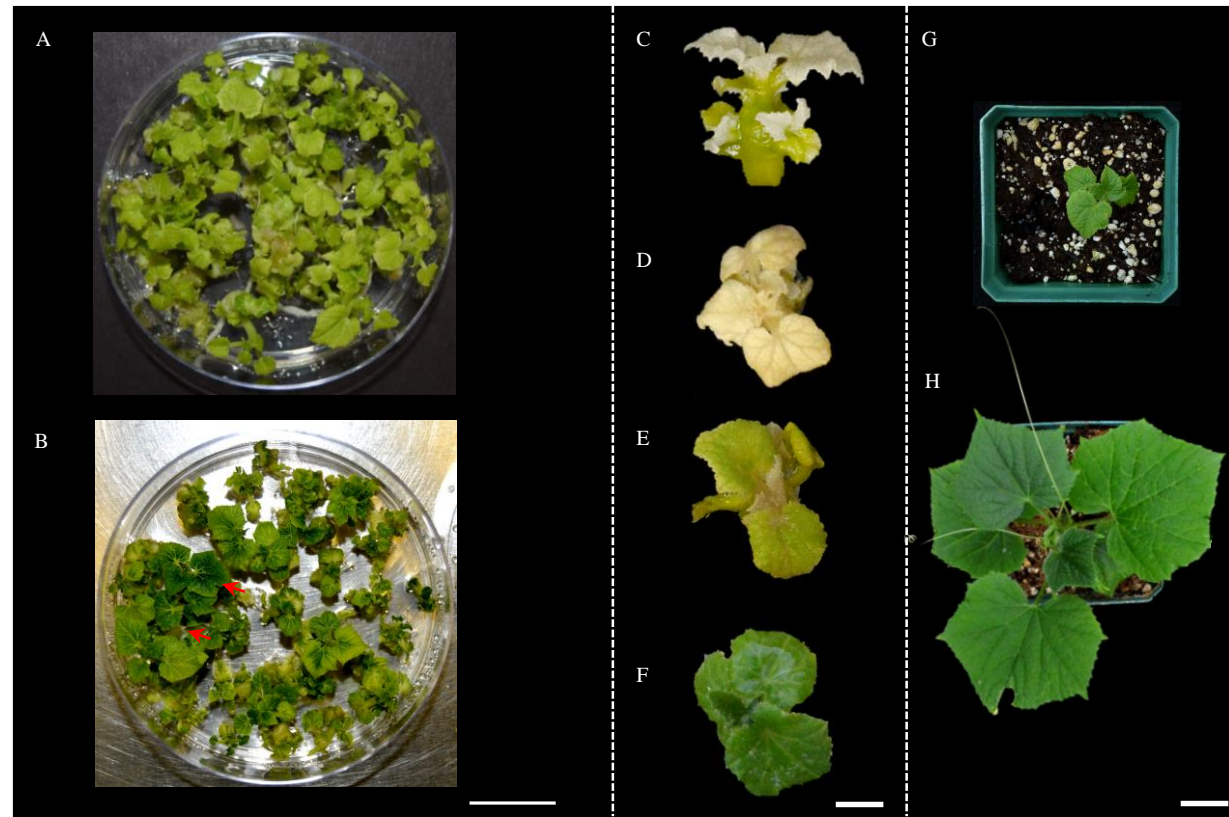

**Figure S3. Development of transgenic plant overexpressing the *LL* gene in PS76 using hypocotyl as the explant. A.** Shoots generated from SAM. **B.** Shoots generated from hypocotyl. **C-F.** Shoots regenerated in growth media selected at 100 mg/L of kanamycin. Only true transformants will survive (**F**). Leaves could be differentiated from the middle and top section of the hypocotyl (**C**). **G** Plantlet is transplanted to soil. **H**  $T_0$  plant is growing in the greenhouse. Bar = 1.0 cm.

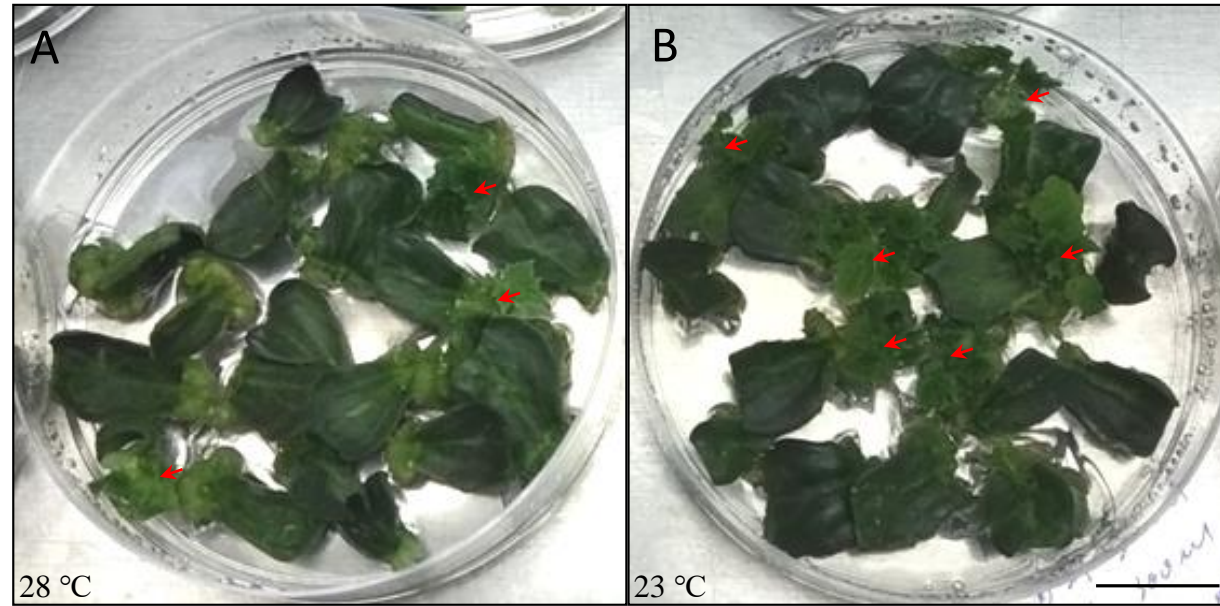

**Figure S4. Shoot regeneration from explants co-cultured with *Agrobacterium* at 28 °C (A) and 23 °C (B) with 50 mg L<sup>-1</sup> kanamycin added in the MS media. The red arrows indicate regenerated shoots. Bar = 1.0 cm.**



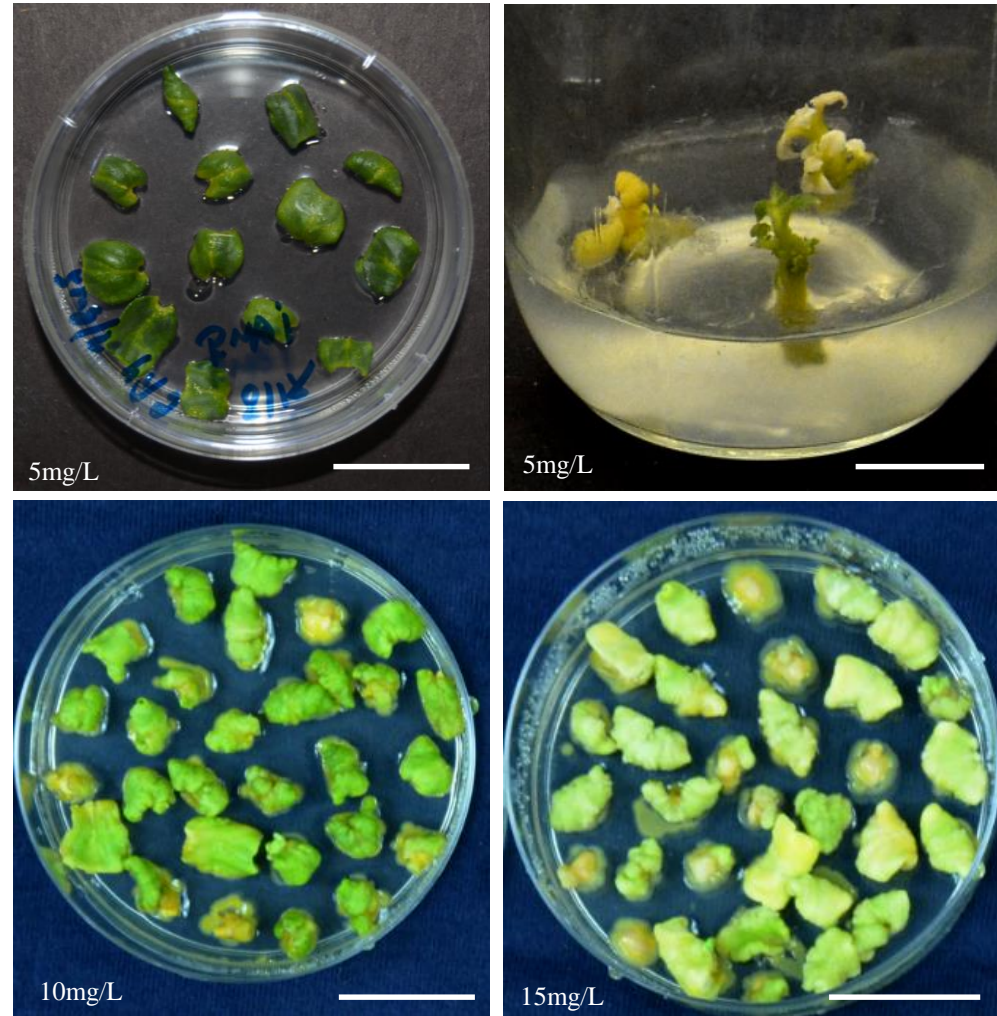

**Figure S5. Effect of concentration of hygromycin on survival of explants and shoot regeneration.** Explants are grown in MS media with 5, 10 and 15 mg L<sup>-1</sup> hygromycin. Bar = 1.0 cm.

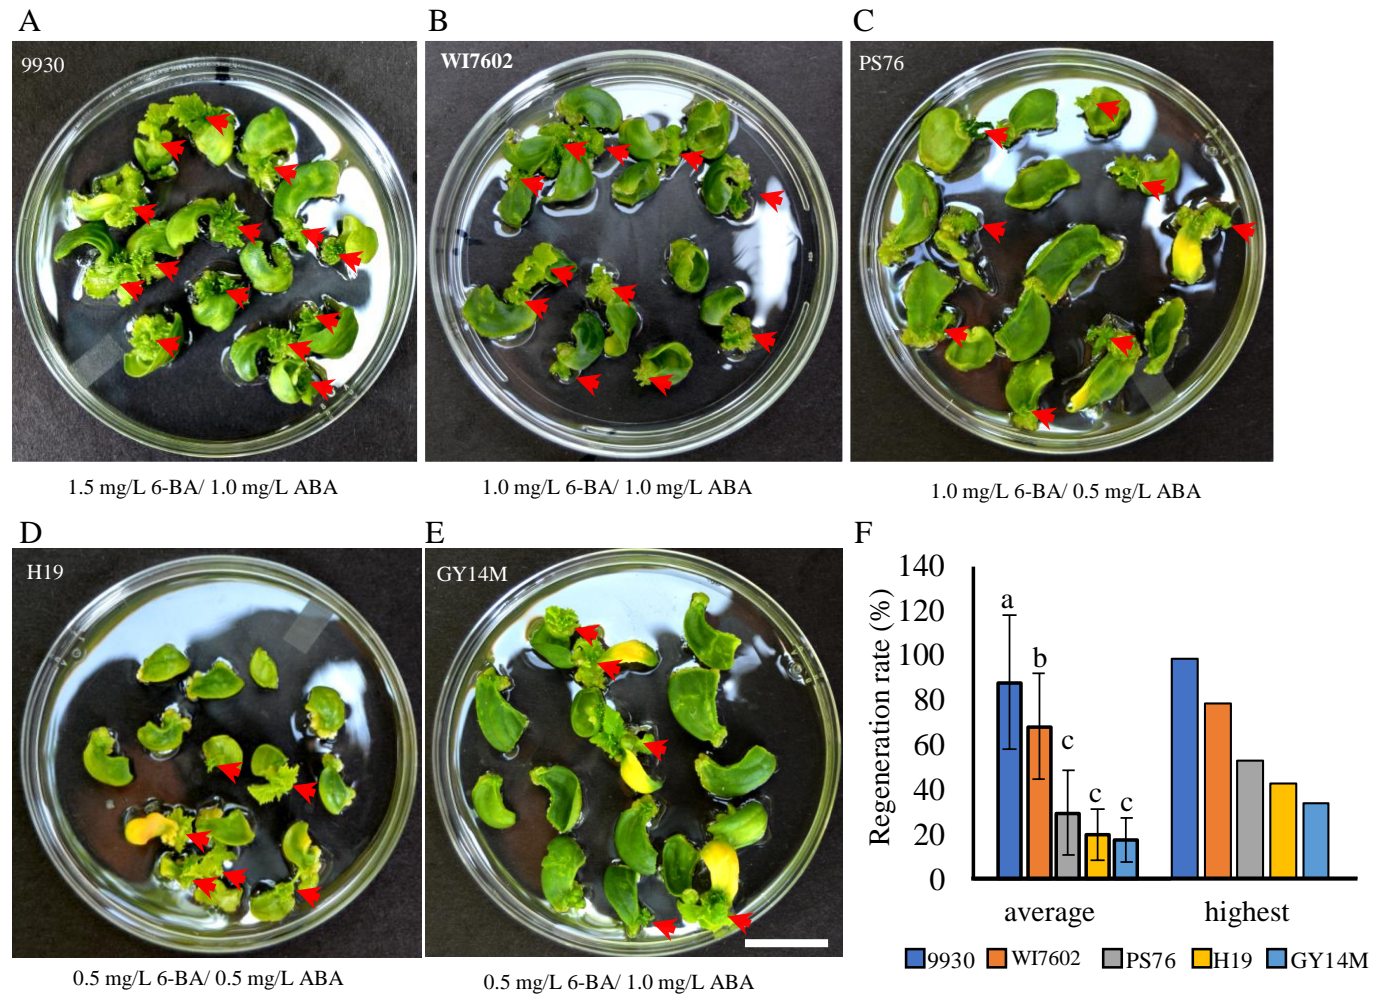

**Figure S6. The highest regeneration frequency at the given hormone concentration in 5 tested cucumber genotypes. A-E.** Represented pictures for explants generating shoots. **F.** The average and highest regenerating rate for each line. Values are means  $\pm$  SD. The letters a–c indicate statistically significant differences between means of shoot regeneration rate based on one-way ANOVA analyses with Tukey HSD test ( $P < 0.05$ ). The red arrows indicate the regenerated shoots. Bar = 1.0 cm.

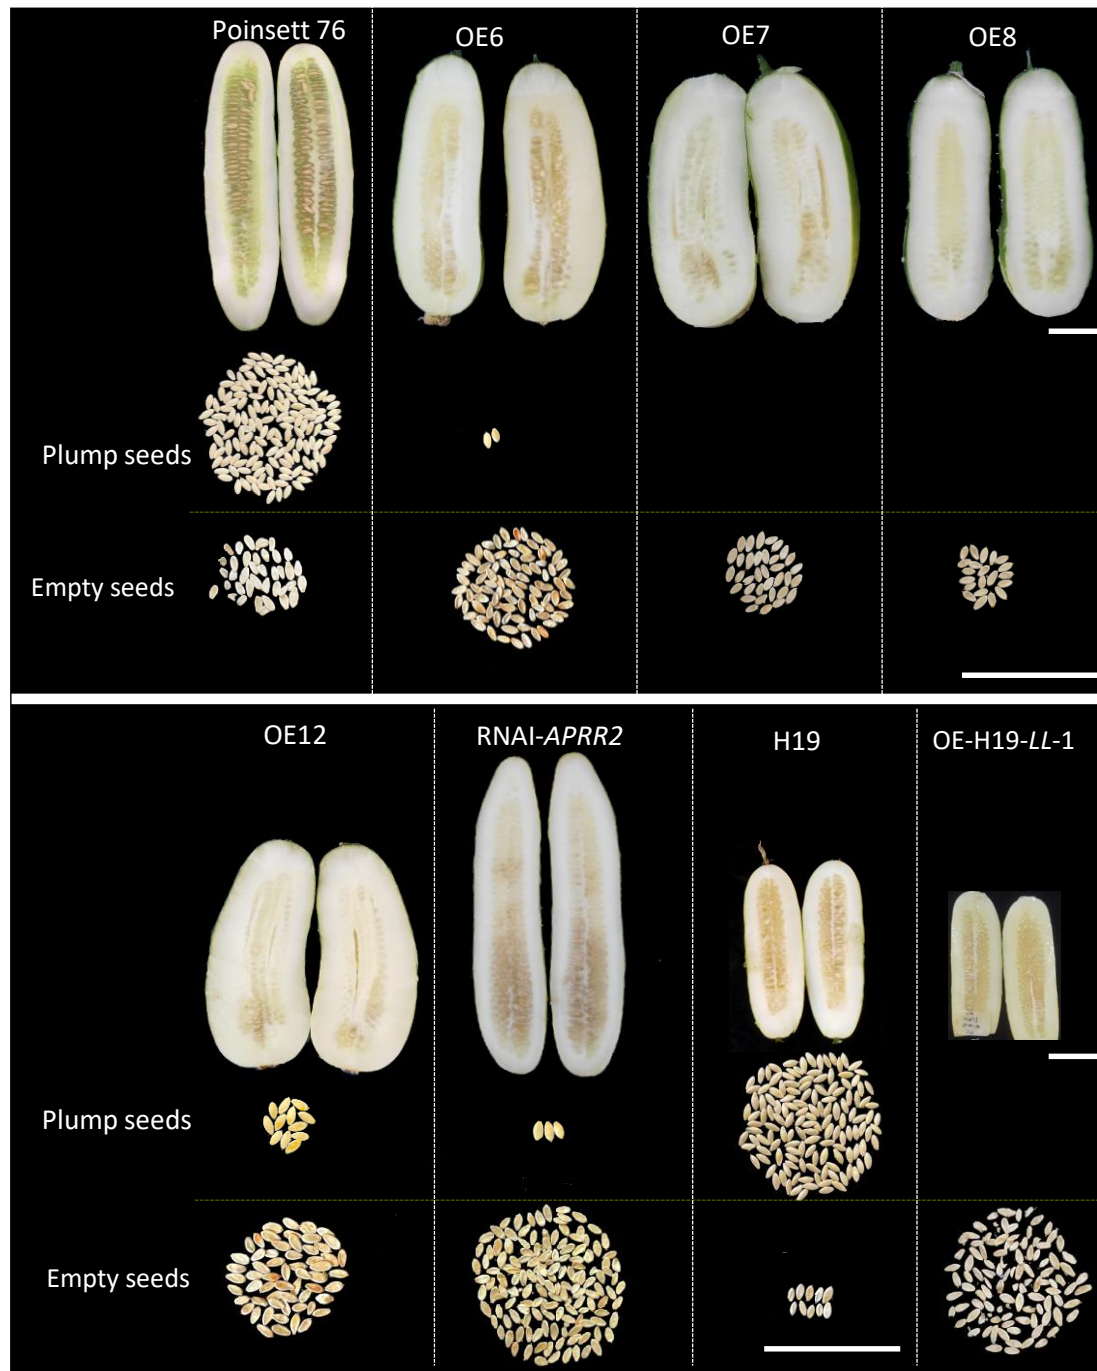

**Figure S7. Lower fertility in T<sub>0</sub> transgenic OE and RNAi plants obtained from the present study.** Poinsett 76 and H19 can set many well-developed plump seeds with very few empty seeds. Fruits from very few OE or RNAi plants have very few well-developed seeds; some are sterile with no seeds. Bar = 5.0 cm.



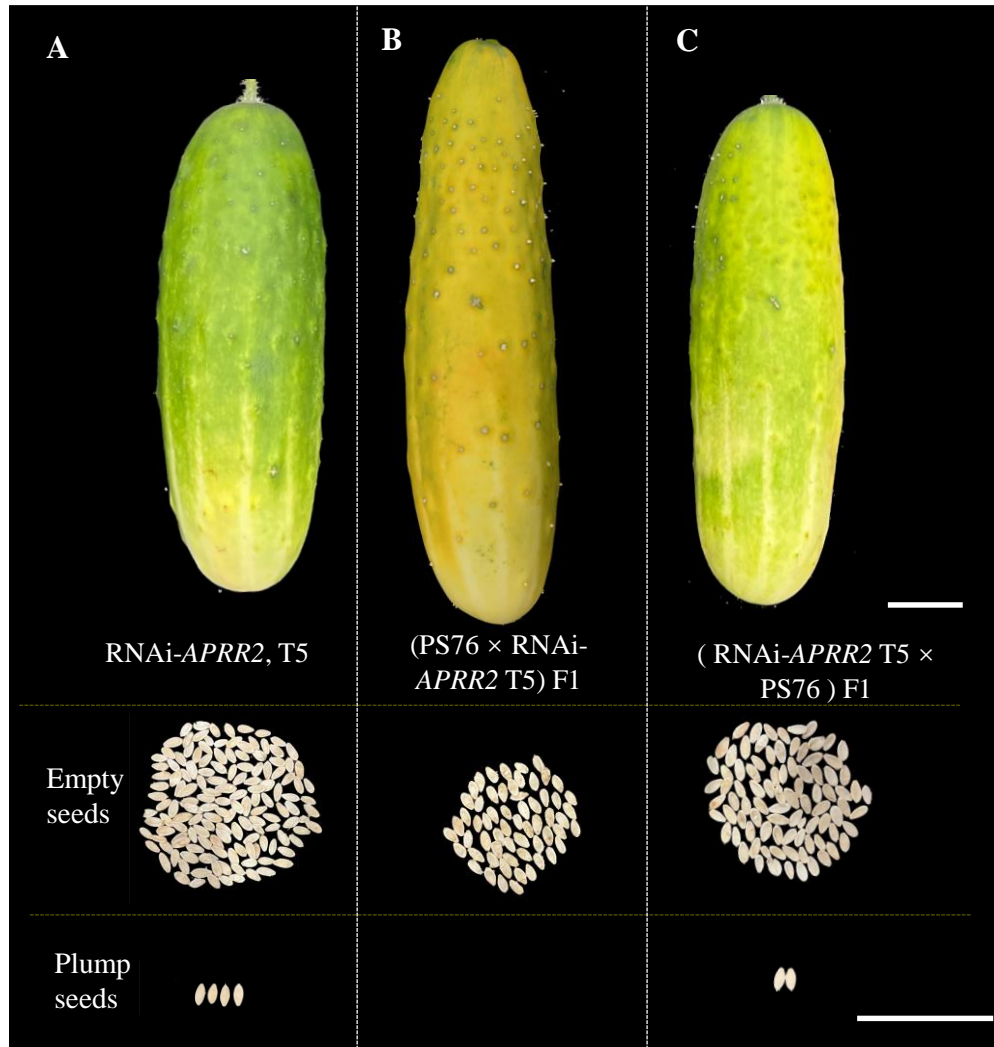

**Figure S8. Lower fertility remains in T<sub>5</sub> transgenic plants of PS76-RNAi-*APRR2*.** Low seed set in T<sub>5</sub> transgenic plants (A) and the reciprocal F<sub>1</sub> from the crosses between RNAi-*APRR2*. T<sub>5</sub> and PS76 (B and C). Bar = 5.0 cm.

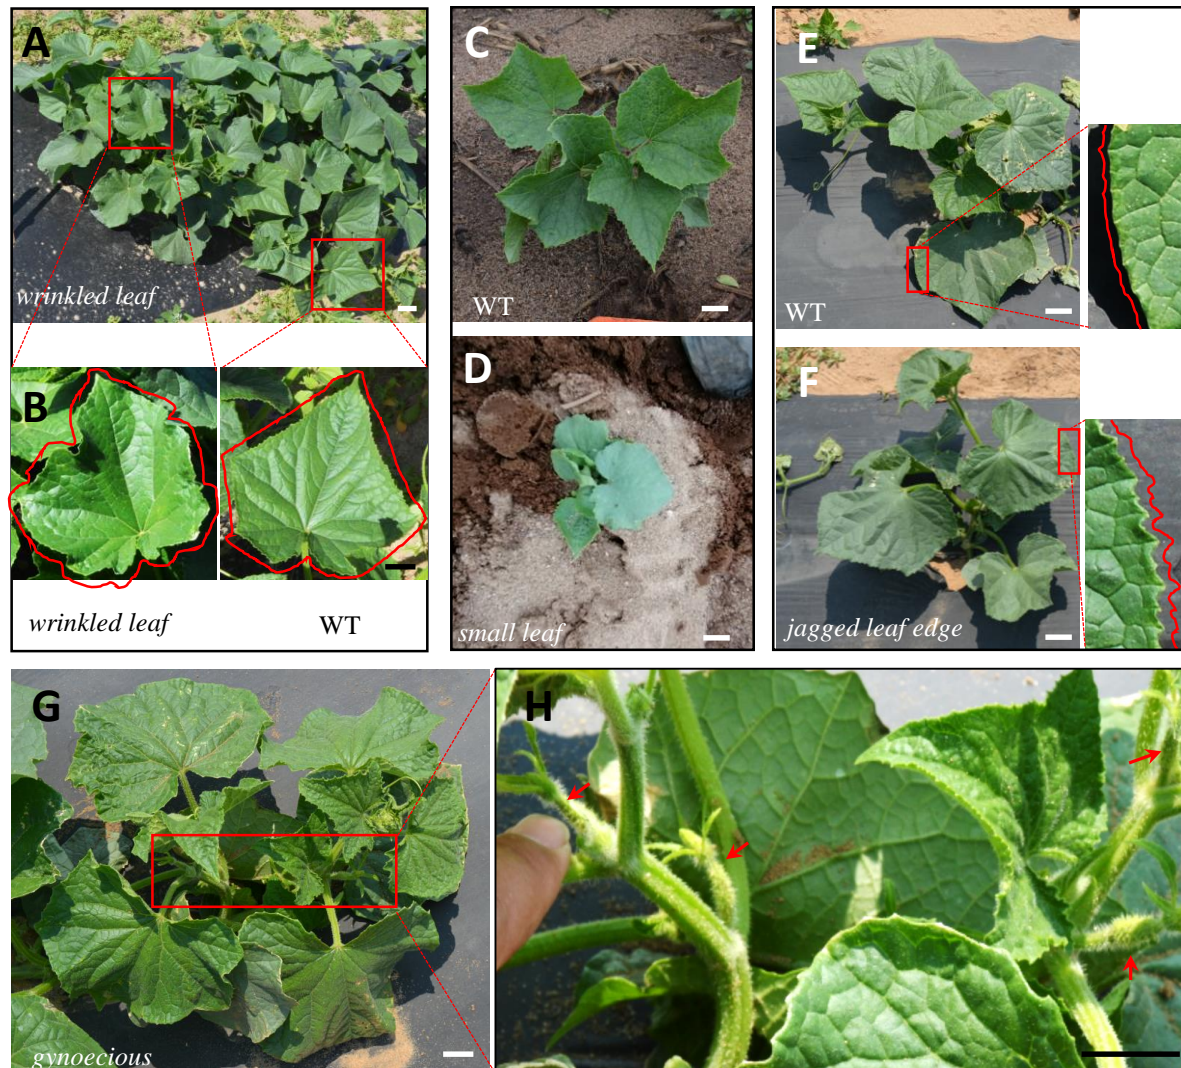

**Figure S9. Examples of more putative T-DNA insertion mutants isolated from PS76-LL-OE  $T_1$  transgenic plants.** The putative mutants are *wrinkled leaf* (A-B), *small leaf* (C-D), *jagged leaf edge* (E-F) and *gynocious* plants (G-H). WT = PS76. The red arrows indicate female flowers. Bar = 5.0 cm.
